# Supplementary material
Source: publisher figshare collection journal article supplement (https://adisjournals.figshare.com/ndownloader/files/26828429)
Supplement: Supplementary file 1 [file 26828429]

# Understanding the benefits of taking tafamidis and the risk factors for admission into the hospital and death in people with transthyretin amyloid cardiomyopathy

Authors: Camille Vong, Martin Boucher, Steve Riley, and Lutz O. Harnisch

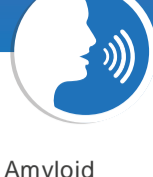

Date of summary: October 2020

The full title of this article is:  
Modeling of Survival and Frequency of Cardiovascular-Related Hospitalization in Patients with Transthyretin Amyloid Cardiomyopathy Treated with Tafamidis

Study number: NCT01994889

Study start date: December 2013

Study end date: February 2018

© The authors, CC-BY-NC [2021]

DOI: 10.1007/s40256-021-00464-y

Amyloid

<A-muh-loyd>

Cardiomyopathy

<KAR-dee-oh-my-AH-puh-thee>

Tafamidis

<tah-FAM-ah-dis>

Transthyretin

<trans-thy-REH-tin>

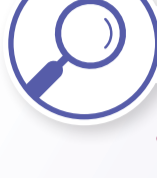

## What did this study look at?

- Transthyretin amyloidosis is a condition in which an abnormal protein forms amyloid and builds up in organs such as the heart
- It may lead to a type of heart disease called transthyretin amyloid cardiomyopathy (ATTR-CM for short)
- When amyloid protein builds up in the heart, it causes the heart walls to become thick and stiff
- This means that the heart struggles to pump enough blood around the body
- This condition is called heart failure

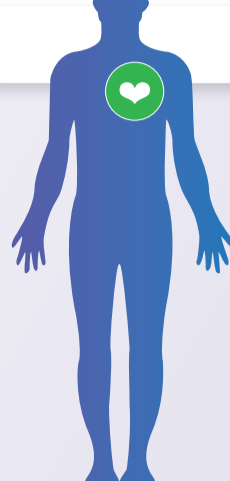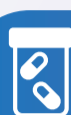

Tafamidis is an approved medicine for people with ATTR-CM

- It works by slowing the build-up of amyloid deposits in the heart

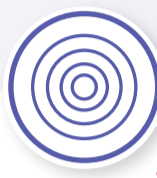

## What was the aim of the study?

- Researchers developed a mathematical model using results from a clinical trial in which people received tafamidis or a placebo. A placebo does not contain any active medicine and looks like the study medicine
- They used this model to understand if tafamidis can:
  - reduce the risk of people with ATTR-CM being admitted into the hospital; or
  - reduce their risk of death
- Researchers also looked at whether different factors were linked to how likely people were to be admitted into the hospital or how long they were likely to live

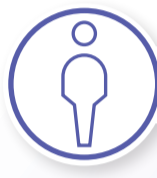

## Who took part in the study?

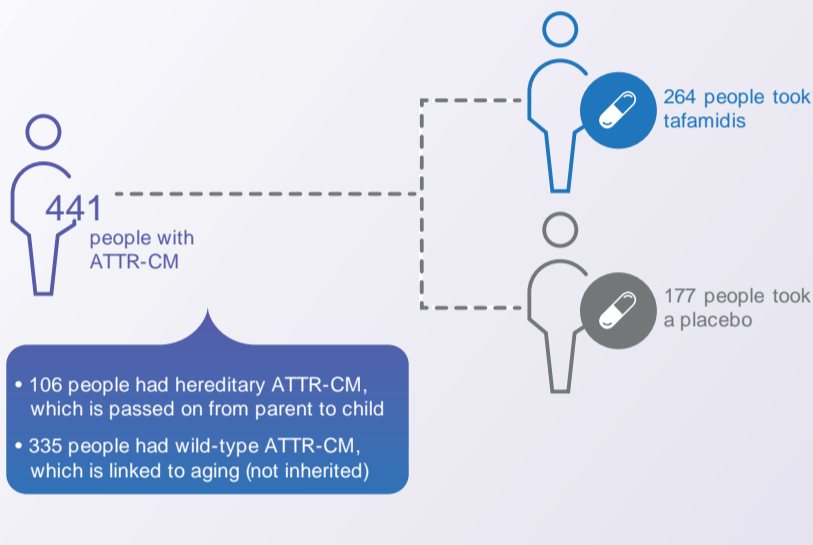

People took tafamidis or a placebo for up to:

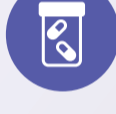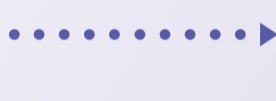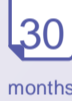

30 months

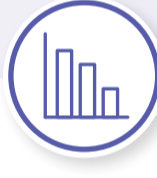

## What were the results of this study?

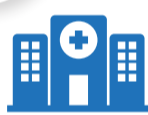

**Risk of being admitted into the hospital because of heart problems**

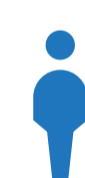

Tafamidis

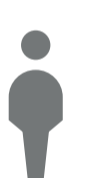

Placebo

People with less severe symptoms of heart failure\* who took tafamidis were

**41%**  
**LESS LIKELY**

to be admitted into the hospital because of heart problems than those who took a placebo

\*The New York Heart Association scoring system was used to group people based on the severity of their symptoms of heart failure. Those in class I or II were considered to have less severe symptoms

Researchers found 4 factors that could help identify people who were less likely to be admitted into the hospital because of heart problems:

2 were based on people's characteristics at the start of the study

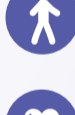

The distance a person could walk in 6 minutes (the farther, the better the outcome)

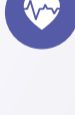

People with a high left ventricular ejection fraction (a measurement of how much blood can be pumped out of the heart with each heartbeat)

2 were based on people's blood test results at the start of the study

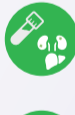

Low levels of urea nitrogen in people's blood (indicates how well a person's kidneys and liver are working)

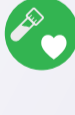

Low levels of a protein called troponin I (a measurement of heart damage)

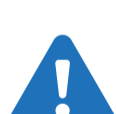

## Risk of death

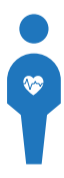

Tafamidis

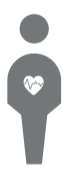

Placebo

People who took tafamidis were

**42%**  
**LESS LIKELY**

to die than those who took a placebo

Researchers found 5 factors that could help identify people who were at a lower risk of death:

3 were based on people's characteristics at the start of the study

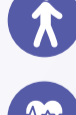

The distance a person could walk in 6 minutes (the farther, the better the outcome)

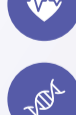

People with a high left ventricular ejection fraction (a measurement of how much blood can be pumped out of the heart with each heartbeat)

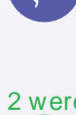

People with wild-type (not inherited) ATTR-CM

2 were based on people's blood test results at the start of the study

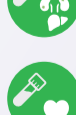

Low levels of urea nitrogen in people's blood (indicates how well a person's kidneys and liver are working)

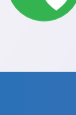

Low levels of a hormone called NT-proBNP (a measurement of heart failure)

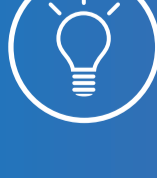

## What were the main conclusions reported by the researchers?

- People with ATTR-CM who took tafamidis were less likely to be admitted to the hospital because of heart problems, or to die, than those who took a placebo
- Factors that could help determine a person's risk of being admitted into the hospital or death were consistent with those previously reported for people with ATTR-CM. These include people's characteristics (such as how far they can walk in 6 minutes) and blood test results
- For more information about this study, please visit:
  - <https://clinicaltrials.gov/ct2/show/NCT01994889>
